# Supplementary material for: The simultaneous electrochemical determination of furazolidone and dimetridazole using transition metal titanates with an ilmenite type structure
Source: Royal Society of Chemistry journal article supplement (doi:10.1039/d1tc03383b), 2021-01-01
Supplement: d1tc03383b1.pdf [file d1tc03383b1.pdf]

# 1 **Simultaneous electrochemical determination of furazolidone and dimetridazole**

## 2 **using transition metal titanates with ilmenite type structure**

3 Jesu Amalraj Antolin Jesila<sup>a</sup>, Narasimha Murthy Umesh<sup>a</sup>, Sea-Fue Wang<sup>a,\*</sup>

4 <sup>a</sup>Department of Materials and Mineral Resources Engineering, National Taipei University of Technology, No. 1,  
5 Section 3, Chung-Hsiao East Road, Taipei 106, Taiwan, ROC

6 \*Corresponding author – Sea-Fue Wang

7 Email: [sfwang@ntut.edu.tw](mailto:sfwang@ntut.edu.tw)

8

## 9 **Materials and apparatus**

10 Cobalt nitrate hexahydrate ( $\text{CoNO}_3 \cdot 6\text{H}_2\text{O}$ ), nickel nitrate hexahydrate ( $\text{NiNO}_3 \cdot 6\text{H}_2\text{O}$ ), zinc  
11 nitrate hexahydrate ( $\text{ZnNO}_3 \cdot 6\text{H}_2\text{O}$ ), nitric acid ( $\text{HNO}_3$ ), sodium hydroxide ( $\text{NaOH}$ ), ethylene  
12 glycol, tetrabutyl titanate (Ti precursor) are bought from Sigma-Aldrich, Canada. Every single  
13 substance and organic chemicals were purchased from Sigma-Aldrich, Taiwan, and utilized  
14 moving forward without any more sanitization. Using double-distilled de-ionized water (DD), all  
15 needed solutions were prepared, and also as a supporting electrolyte,  $\text{Na}_2\text{HPO}_4$  (disodium  
16 hydrogen phosphate) and  $\text{NaH}_2\text{PO}_4$  (sodium dihydrogen phosphate) were used.  $\text{NaOH}$  and  $\text{HNO}_3$   
17 were used to prepare all the pH buffer solutions.

## 18 **Instrument**

19 The surface morphology examinations and the elemental analysis of as-prepared metal  
20 titanates have been performed using dispersive energy X-ray (EDX, HORIBA EMAX XACT).  
21 The crystallographic analysis of our composite has been carried out with X-ray diffraction (XRD)  
22 spectroscopy (Rigaku D/maxB, DMX-2200), and transmission electron microscopy (TEM) was  
23 analyzed using H-7600, Hitachi-Japan.

## 24 **Synthesis procedure**

25         In this simple synthesis procedure, 6 mM of the cobalt precursor and 6 mM of  $\text{Ti}^{4+}$   
26 precursors were added to a mixture of solvents like ethanol and ethylene glycol 75 mL (1:1). The  
27 above mixture was stirred for 30 min by using a magnetic stirrer to obtain a homogenous solution.  
28 Later the mixed solution was transferred to a Teflon-lined autoclave and maintained at 200 °C for  
29 18 h. Then the autoclave was allowed to cool down generally to room temperature, and the formed  
30 product was collected via centrifugation which was washed thoroughly with water and ethanol five  
31 times. Then, the precipitate was dried at 60 °C overnight, and finally, the obtained powder was  
32 calcined at 700 °C for 2 h with a heating and cooling rate 7 °C/min to achieve the target compound  
33 cobalt titanate ( $\text{CoTiO}_3$ ). Similarly, instead of Cobalt precursor, nickel nitrate and zinc nitrate were  
34 used to synthesize nickel titanate and zinc titanate ( $\text{NiTiO}_3$  and  $\text{ZnTiO}_3$ ).

## 35 **Mechanism of crystal growth formation**

36         The physical characterization results obtained for metal titanates depict phase and  
37 morphology confirmation based on the above-given information. The formation mechanism of  
38 perovskite-type metal titanates involving the crystallization process was the same as previously  
39 reported literature<sup>1,2</sup>. A possible formation mechanism for the crystallization and polymerization  
40 process is shown in **Figure S1**. The mechanism describes the formation of micro/nanostructured  
41 metal titanates. A specific volume of ethanol to ethylene glycol was used for the synthesis.  
42 Ethylene glycol acts as a complexing agent and plays a vital role in the structural property of as-  
43 synthesized metal titanates. To obtain Ti-glycolate polymer with the chelating ring-like structure  
44 or chain-like structure, ethylene glycol, a bidentate ligand, may react with tetrabutyl titanate.  
45 During the solvothermal process, because of metal ions' coordination ability with ethylene glycol,  
46 Ti–O–EG polymer chains involve absorbing  $\text{M}^{2+}$  ( $\text{M} = \text{Co}, \text{Ni}, \text{Zn}$ ) ions. Ti's stabilization obtained

by the uniformly dispersed structure–O–EG polymer chains is prolonged by increasing ethanol's volume ratio to ethylene glycol (2:1). Due to ethylene glycol molecules' hydrogen bonding, the polymer chains slowly agglomerate with an additional increase in ethanol volume to ethylene glycol (1:1). The porous structure of metal titanates is obtained by drying and calcination of the received product. The porous structure is obtained due to the decomposition of organic polymers.

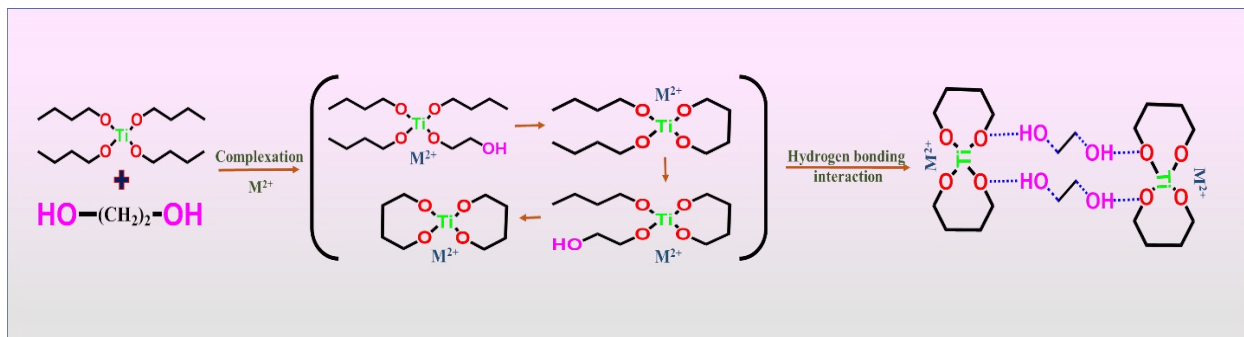

**Figure S1. Formation mechanism of metal titanate**

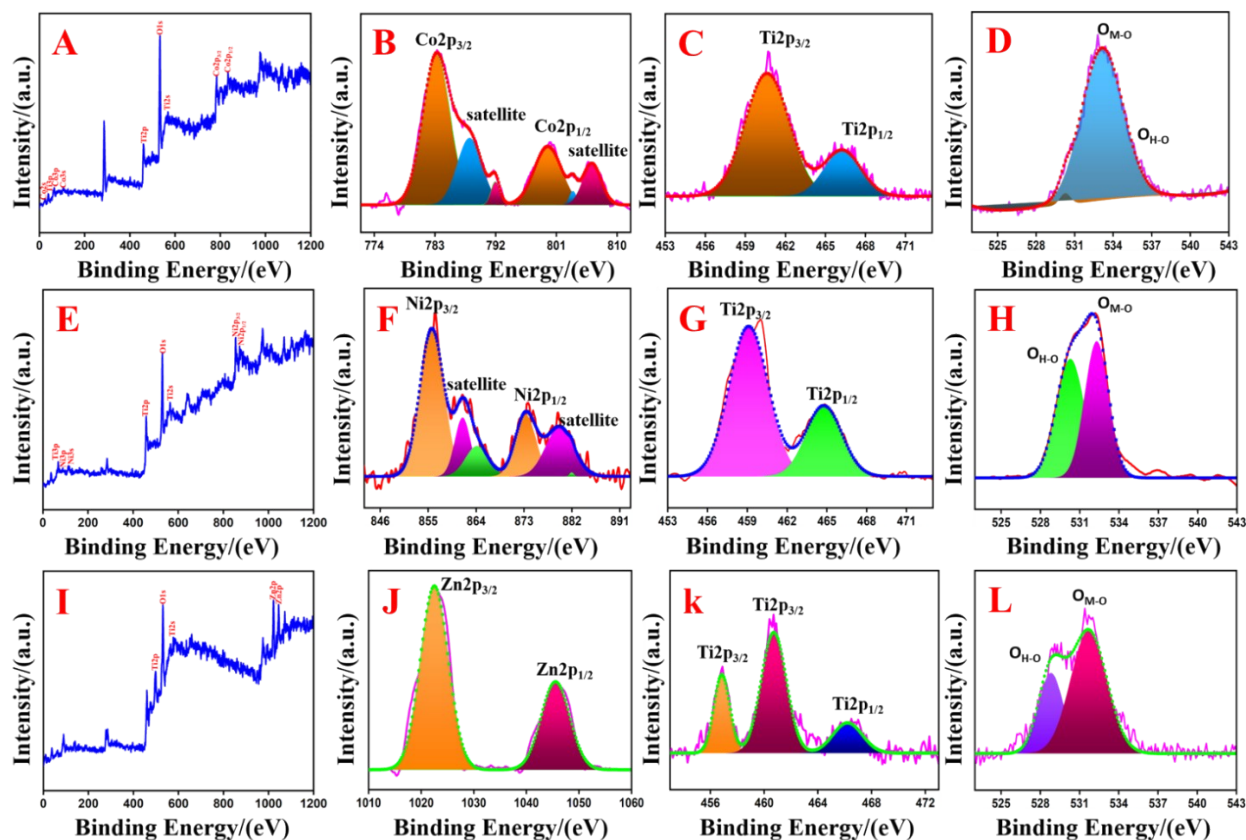

Figure S2. XPS spectra of A- CoTiO<sub>3</sub>: survey spectrum, B- Co 2p spectra, C- Ti 2p spectra, and D- O 1s spectra. Figure 2E- XPS spectra of NiTiO<sub>3</sub>: survey spectrum, F- Ni 2p spectra, G- Ti 2p spectra, and H- O 1s spectra. Figure 2I- XPS spectra of ZnTiO<sub>3</sub>: survey spectrum, J- Zn 2p spectra, K- Ti 2p spectra, and L- O 1s spectra.

## Electrochemical instrument

Three electrode system is used to perform electrochemical studies. For the working electrode glassy carbon electrode (GCE), as the counter electrode platinum wire and as the reference electrode, silver/silver chloride (Ag/AgCl in 3M KCl) was used.

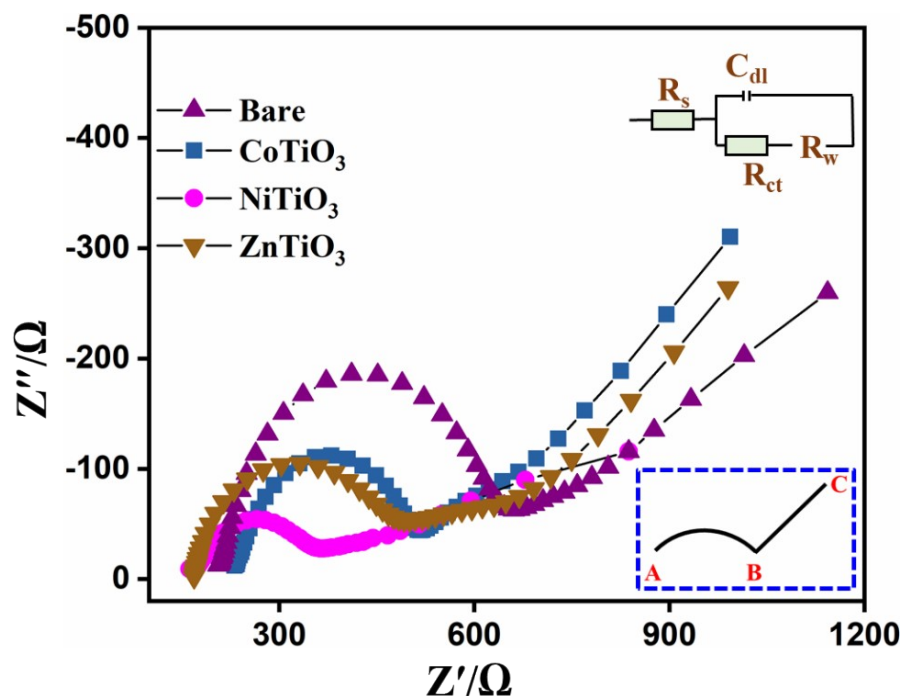

Figure S3. EIS analysis for different modified electrodes.

67

**Table S1** Parameters related to the Nyquist plot and average size calculation.

| Electrode               | $R_s$        | $R_{ct}$     | $C_{dl}$         | EASA       | crystallite size | Average size |
|-------------------------|--------------|--------------|------------------|------------|------------------|--------------|
|                         | ( $\Omega$ ) | ( $\Omega$ ) | ( $\mu F/cm^2$ ) | ( $cm^2$ ) | [XRD (nm)]       | [TEM (nm)]   |
| Bare GCE                | 210.78       | 436.34       | 1.61             | 0.1466     | -                | -            |
| CoTiO <sub>3</sub> /GCE | 235.84       | 281.2        | 1.76             | 0.1850     | 66.94            | 93.5         |
| NiTiO <sub>3</sub> /GCE | 167.92       | 198.64       | 2.16             | 0.2218     | 39.34            | 70.32        |
| ZnTiO <sub>3</sub> /GCE | 166.67       | 318.55       | 1.65             | 0.1659     | 86.41            | 104.78       |

68

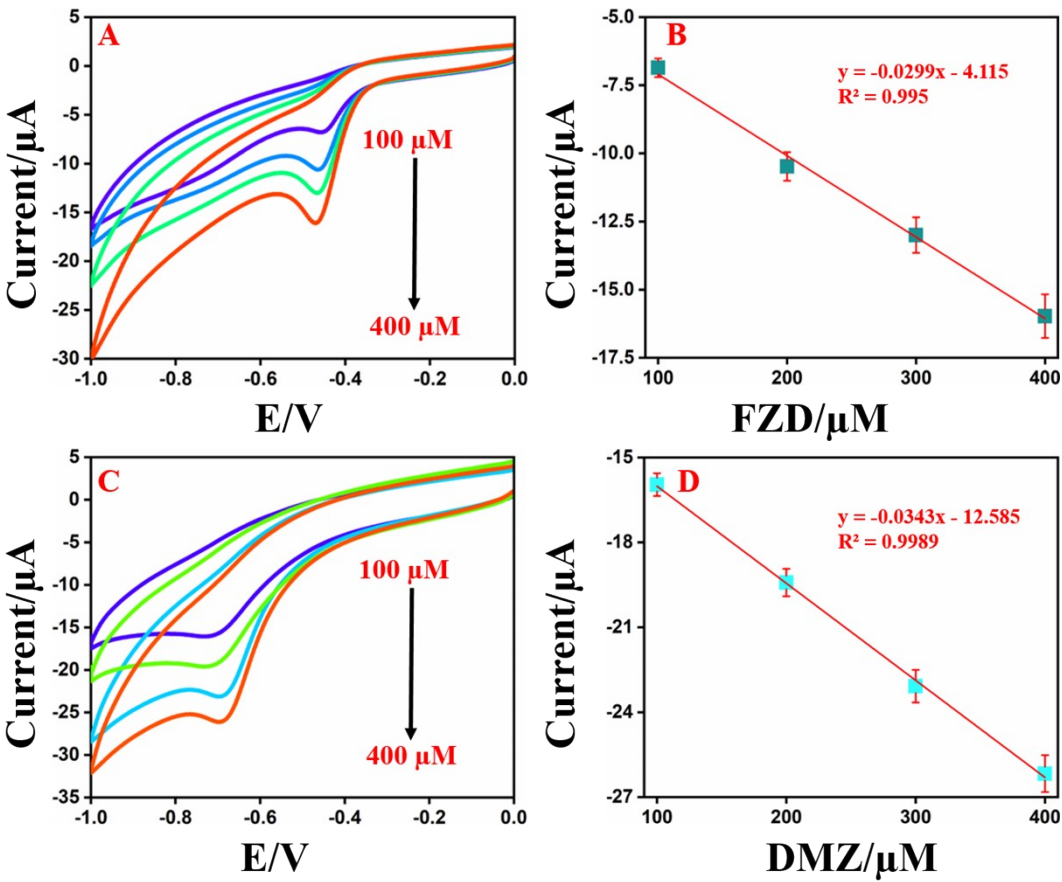

69

**Figure S4.** A-Different concentration of FZD (100 to 400  $\mu M$ ) at CoTiO<sub>3</sub>/GCE in 0.1 M PB solution (pH 7.0) at 50 mV/s, B-calibration plot for the concentration of FZD Vs. current obtained,

72 C- different concentration of DMZ (100 to 400  $\mu\text{M}$ ) at CoTiO<sub>3</sub>/GCE in 0.1 M PB solution (pH  
73 7.0) at 50 mV/s, D-calibration plot for the concentration of DMZ Vs. current obtained.

74 **Figure S4** depicts the individual CVs for CoTiO<sub>3</sub>/GCE with different concentrations  
75 of FZD (100 – 400  $\mu\text{M}$ ) is shown in **Figure S4.A** and DMZ (100 – 400  $\mu\text{M}$ ) are shown in **Figure**  
76 **S4.C**. An excellent linear response upon each addition was observed in both FZD and DMZ.  
77 **Figure S4.B** depicts the linearity plot for the concentration of FZD vs. current obtained, and  
78 **Figure S4.D** displays the linearity plot for the concentration of DMZ vs. current obtained. In both,  
79 the plot concentration of each analyte is directly proportional to the current obtained.

80

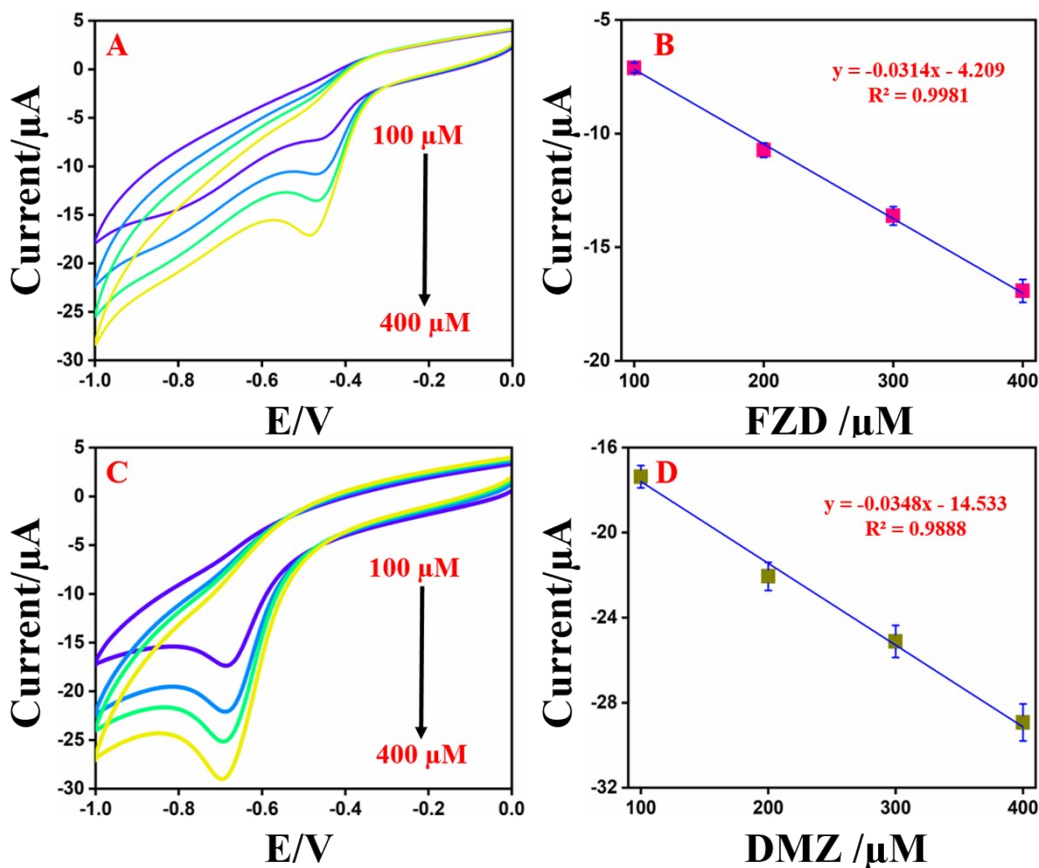

81

82 **Figure S5.** A-Different concentration of FZD (100 to 400  $\mu\text{M}$ ) at  $\text{NiTiO}_3/\text{GCE}$  in 0.1 M PB  
83 solution (pH 7.0) at 50 mV/s, B-calibration plot for the concentration of FZD Vs. current obtained,  
84 C- different concentration of DMZ (100 to 400  $\mu\text{M}$ ) at  $\text{NiTiO}_3/\text{GCE}$  in 0.1 M PB solution (pH 7.0)  
85 at 50 mV/s, D-calibration plot for the concentration of DMZ Vs. current obtained.

86 Secondly, **Figure S5** depicts the individual CVs for  $\text{NiTiO}_3/\text{GCE}$  with different concentrations of  
87 FZD (100 – 400  $\mu\text{M}$ ) is shown in **Figure S5.A** and DMZ (100 – 400  $\mu\text{M}$ ) are shown in **Figure**  
88 **S5.C**. An excellent linear response upon each addition was observed in both FZD and DMZ.  
89 **Figure S5.B** depicts the linearity plot for the concentration of FZD vs. current obtained, and  
90 **Figure S5.D** displays the linearity plot for the concentration of DMZ vs. current obtained. In both,  
91 the plot concentration of each analyte is directly proportional to the current obtained.

92

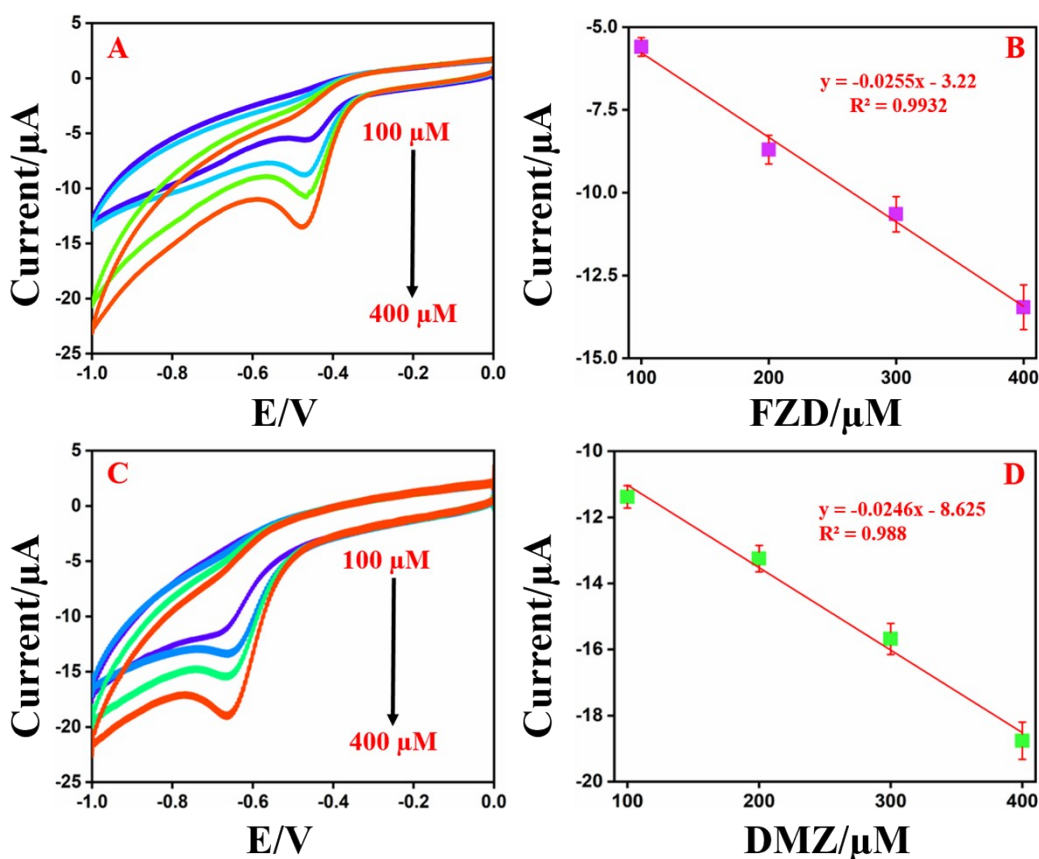

93

94 **Figure S6.** A-Different concentration of FZD (100 to 400  $\mu\text{M}$ ) at  $\text{ZnTiO}_3/\text{GCE}$  in 0.1 M PB  
 95 solution (pH 7.0) at 50 mV/s, B-calibration plot for the concentration of FZD Vs. current obtained,  
 96 C- different concentration of DMZ (100 to 400  $\mu\text{M}$ ) at  $\text{ZnTiO}_3/\text{GCE}$  in 0.1 M PB solution (pH  
 97 7.0) at 50 mV/s, D-calibration plot for the concentration of DMZ Vs. current obtained.

98 Finally, **Figure S6** depicts the individual CVs for  $\text{ZnTiO}_3/\text{GCE}$  with different  
 99 concentrations of FZD (100 – 400  $\mu\text{M}$ ) shown in **Figure S6.A** and DMZ (100 – 400  $\mu\text{M}$ ) shown  
 100 in **Figure S6.C**. An excellent linear response upon each addition was observed in both FZD and  
 101 DMZ. **Figure S6.B** depicts the linear calibration plot for the concentration of FZD vs. current  
 102 obtained, and **Figure S6.D** displays the linear calibration plot for the concentration of DMZ vs.  
 103 current obtained. In both, the plot concentration of each analyte is directly proportional to the  
 104 current obtained. Besides, the individual current response received at each modified electrode for  
 105 FZD and DMZ as shown in **Figure S6**.

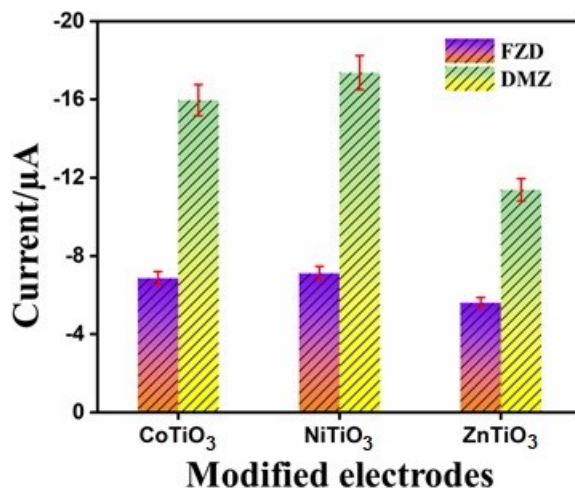

106  
 107 **Figure S7.** Bar diagram for different metal titanate modified electrodes of individual concentration  
 108 of FZD and DMZ vs. current obtained.

109 The above Figure demonstrates that  $\text{NiTiO}_3/\text{GCE}$  showed an outstanding sensing performance and  
 110 anti-fouling effects of individual analytes such as FZD and DMZ than  $\text{CoTiO}_3/\text{GCE}$  and

111 ZnTiO<sub>3</sub>/GCE. The reason might be due to the highly selective sensing capability of FZD and DMZ  
 112 at the NiTiO<sub>3</sub> electrode surface, more significant electrochemical active sites, and larger  
 113 electrochemical active surface area.

114

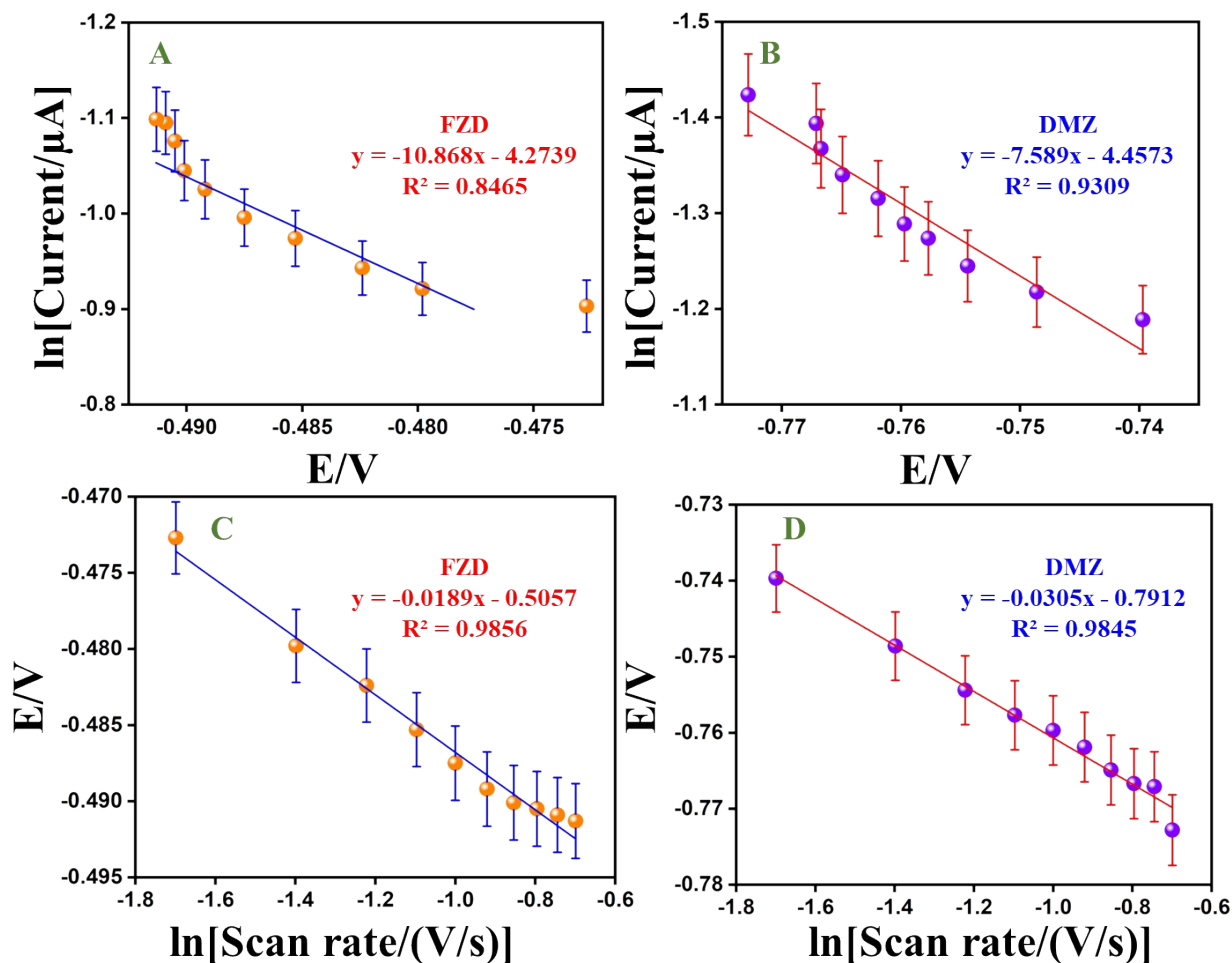

115

116 **Figure S8.** Corresponding calibration plot of Potential ( $E/\text{V}$ ) vs.  $\ln$ . Current ( $\mu\text{A}$ ) A. for FZD and  
 117 B. for DMZ in 0.1 M PB solution (pH 7.0) at NiTiO<sub>3</sub>/GCE towards the simultaneous detection of  
 118 100  $\mu\text{M}$  FZD and DMZ. Corresponding calibration plot of  $\ln$ . Scan rate ( $\text{V/s}$ ) vs. Potential ( $E/\text{V}$ )  
 119 A. for FZD and B. for DMZ in 0.1 M PB solution (pH 7.0) at NiTiO<sub>3</sub>/GCE towards the  
 120 simultaneous detection of 100  $\mu\text{M}$  FZD and DMZ

121 **Table S2** Electro-catalytic and kinetic Parameters.

| Analytes | surface coverage ( $\Gamma$ ) | No. of electrons | Charge transfer coefficient | Rate constant (Ks) |
|----------|-------------------------------|------------------|-----------------------------|--------------------|
|          | nM/cm <sup>2</sup>            | transferred      | ( $\alpha$ )                | s <sup>-1</sup>    |
| FZD      | 1.8127                        | 3.95             | 0.8385                      | 6.5805             |
| DMZ      | 3.5118                        | 4.06             | 0.8872                      | 3.9813             |

122

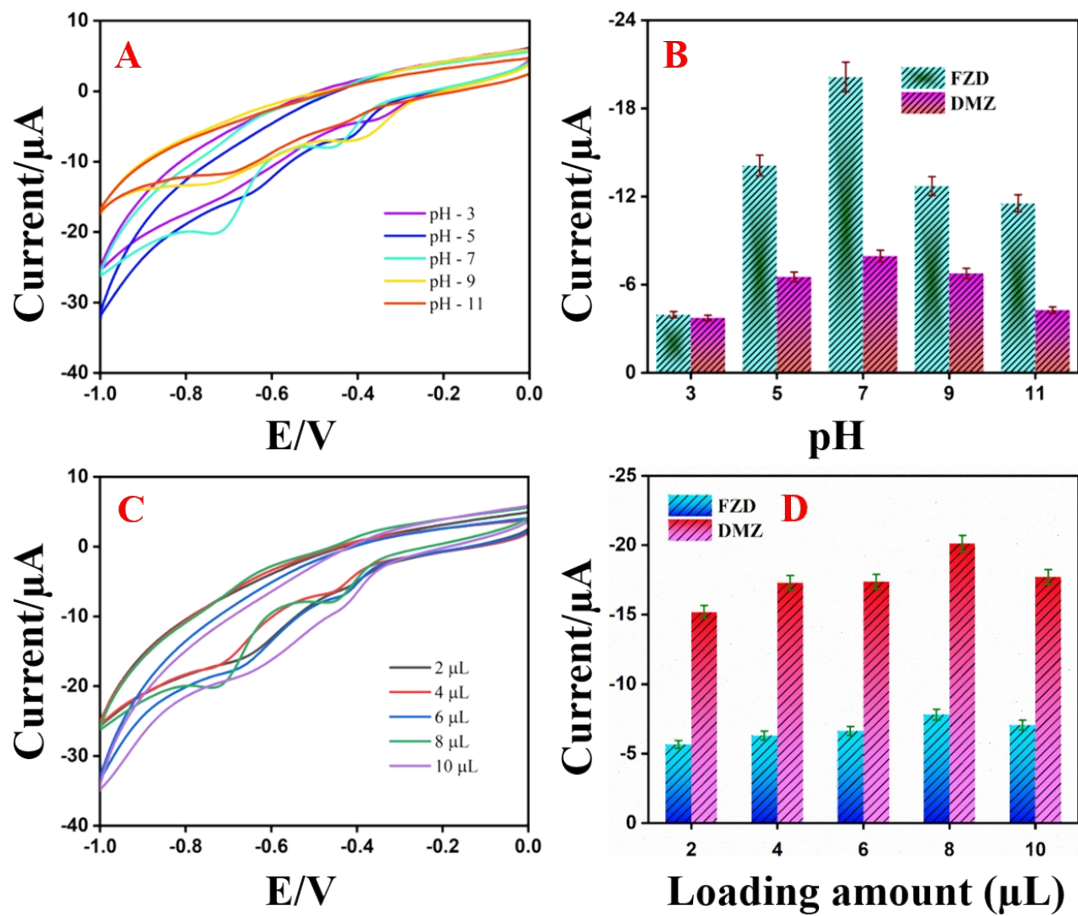

123

124 **Figure S9.** A-CV's for the effect of pH on NiTiO<sub>3</sub>/GCE towards 150 μM simultaneous addition  
125 of FZD and DMZ at 50 mV/s, B-bar diagram for different pH vs. Current, C-CV's for the effect  
126 of different loading amount in NiTiO<sub>3</sub>/GCE in 0.1 M PB solution (pH 7.0) at 50 mV/s 150

127  $\mu\text{M}$  simultaneous addition of FZD and DMZ and D-bar diagram for loading amount vs. Current  
128 obtained.

### 129 **Optimization of DPV for the quantification of FZD and DMZ:**

130 Using the modified simplex method, the variables related to the DPV technique were  
131 optimized to maximize the cathodic current related to FZD and DMZ reduction. The optimization  
132 was undertaken in such a manner that one parameter was always altered within the procedure while  
133 the second one was remained unchanged.<sup>3,4</sup> For this DPV optimization, the experiment was  
134 performed with FZD (40  $\mu\text{M}$ ) and DMZ (60  $\mu\text{M}$ ) in 0.1 M PB solution (pH 7.0) at the potential  
135 range of -0.2 V to -1.2 V respectively. The experiments were performed until achieving the  
136 optimum parameters in both the reduction of FZD and DMZ individually, and the optimized  
137 conditions are shown in Table S3.

138 **Table S3** Optimized parameters for FZD and DMZ analysis by DPV.

| Parameters               | Optimized values |
|--------------------------|------------------|
| Increment Potential (mV) | 4                |
| Pulse Amplitude (mV)     | 50               |
| Pulse Width (ms)         | 50               |
| Pulse Period (ms)        | 300              |
| Sampling width (ms)      | 16.7             |
| Quiet time (s)           | 1                |

139

140

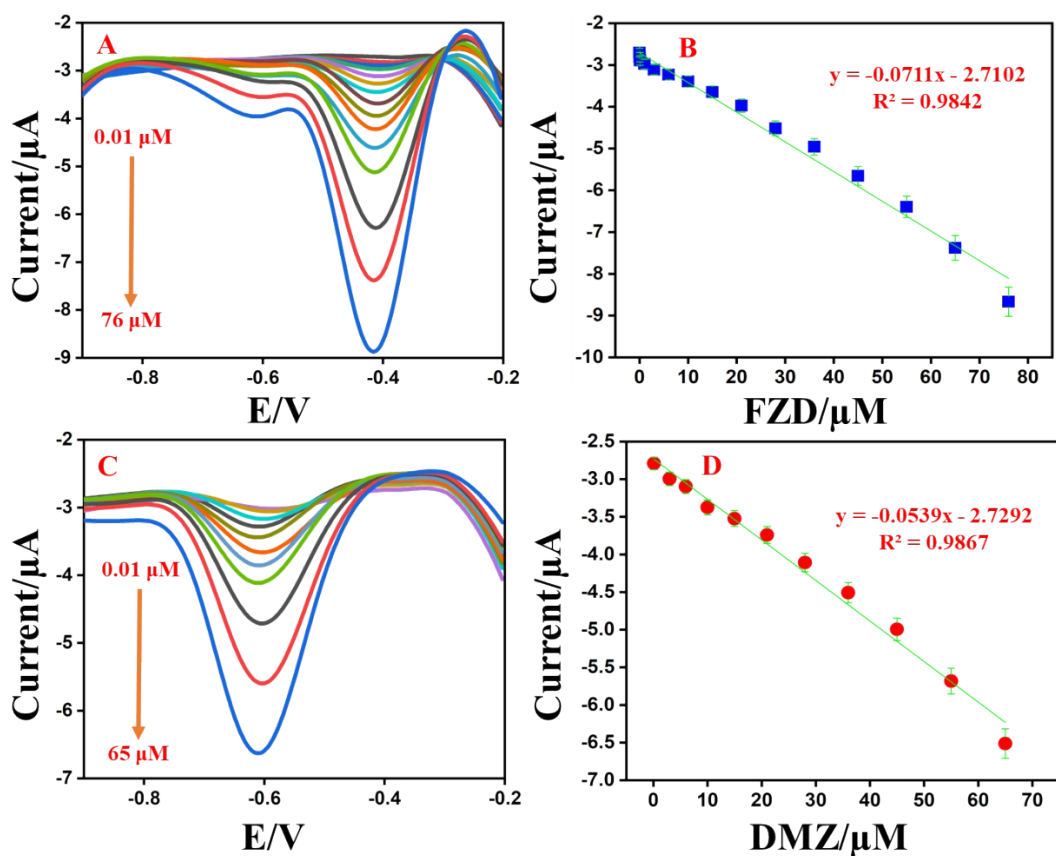

141

142 **Figure S10.** A– Individual DPV analysis of FZD (0.01 to 76  $\mu\text{M}$ ) at NiTiO<sub>3</sub>/GCE in 0.1 M PB  
 143 solution (pH 7.0) at the potential range of -0.2 V to -1.2 V with the optimized parameters (pulse  
 144 amplitude – 50 mV; pulse width – 50 ms; pulse period – 300 ms; quiet time – 1 s), B– Calibration  
 145 plot of concentration of FZD vs. current, C– Individual DPV analysis of DMZ (0.01 to 65  $\mu\text{M}$ ) at  
 146 NiTiO<sub>3</sub>/GCE in 0.1 M PB solution (pH 7.0) at the potential range of -0.2 V to -1.2 V with the  
 147 optimized parameters (pulse amplitude – 50 mV; pulse width – 50 ms; pulse period – 300 ms;  
 148 quiet time – 1 s), D– Calibration plot of concentration of DMZ Vs current.

149

150

151

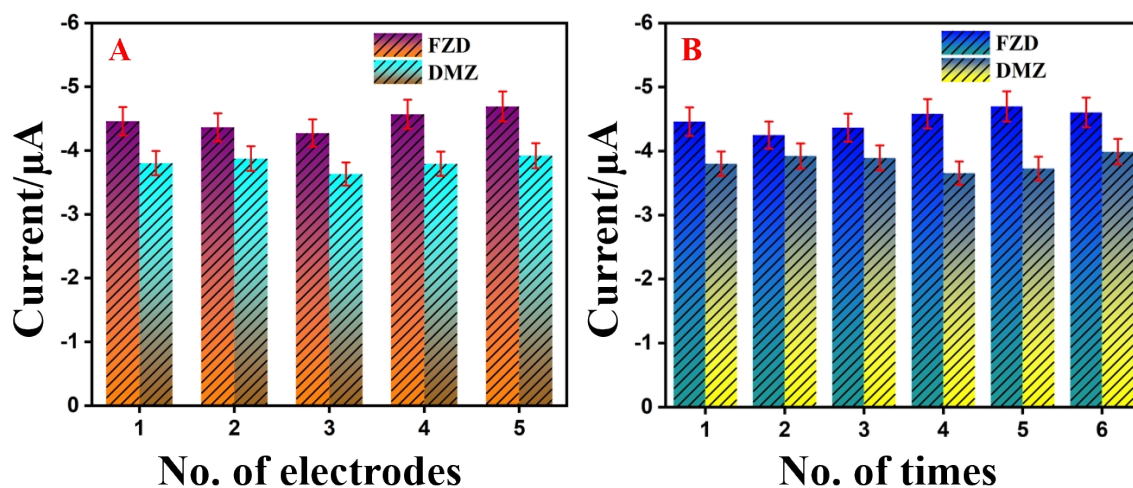

152

153 **Figure S11.** A-Reproducibility and B-repeatability studies of NiTiO<sub>3</sub>/GCE towards 150

154 μM simultaneous addition of FZD and DMZ at 50 mV/s in 0.1 M PB solution (pH 7.0)

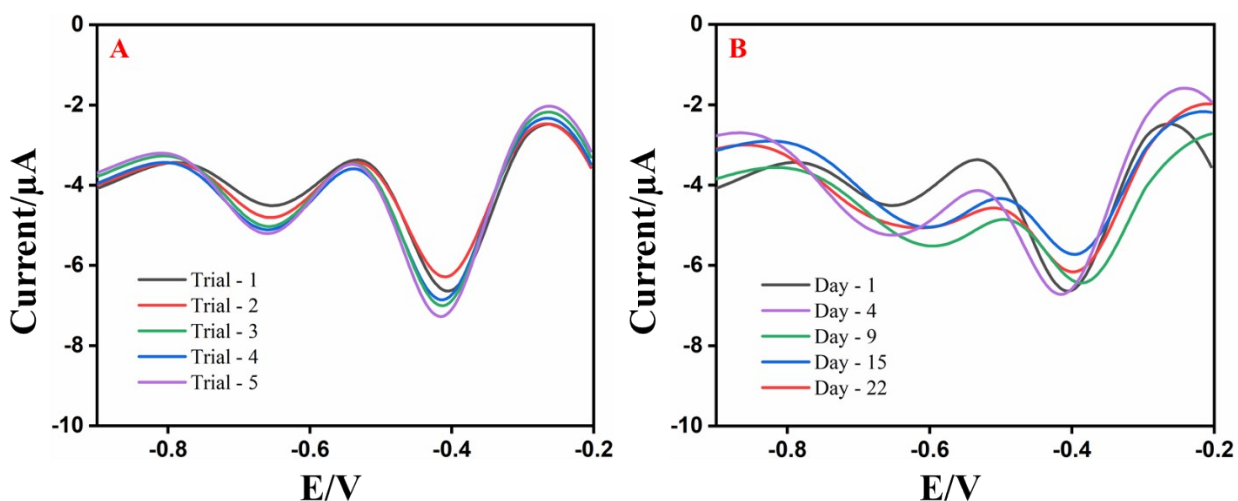

155

156 **Figure S12.** A&B – Intra-day stability analysis and Inter-day stability analysis with 50 μM of

157 FZD and DMZ at NiTiO<sub>3</sub>/GCE in 0.1 M PB solution (pH 7.0) at the potential range of -0.2 V to -

158 1.2 V with the optimized parameters (pulse amplitude – 50 mV; pulse width – 50 ms; pulse period

159 – 300 ms; quiet time – 1 s).

160

161

## 162 **References**

- 163 1 A. Moghtada and R. Ashiri, *Ultrason. Sonochem.*, 2015, **26**, 293–304.
- 164 2 A. Moghtada and R. Ashiri, *Ultrason. Sonochem.*, 2016, **33**, 141–149.
- 165 3 G. Y. Aguilar-Lira, A. Rojas-Hernández, J. A. Rodriguez, M. E. Páez-Hernández and G.
- 166 A. Álvarez-Romero, *J. Electrochem. Soc.*, 2020, **167**, 166510.
- 167 4 L. Švorc, K. Borovska, K. Cinková, D. M. Stanković and A. Planková, *Electrochim. Acta*,
- 168 2017, **251**, 621–630.
- 169
